# Supplementary material for: Cryoconite as an efficient monitor for the deposition of radioactive fallout in glacial environments
Source: Copernicus journal article supplement (doi:10.5194/tc-2019-176), 2019-08-23
Supplement: Supplementary file 1 [file tc-2019-176-supplement.zip]

# Supplementary material to: “Cryoconite as an efficient monitor for the deposition of radioactive fallout in glacial environments”

Giovanni Baccolo<sup>1,2</sup>, Edyta Łokas<sup>3</sup>, Paweł Gaca<sup>4</sup>, Dario Massabò<sup>5,6</sup>, Roberto Ambrosini<sup>7</sup>, Roberto S. Azzoni<sup>7</sup>, Caroline Clason<sup>8</sup>, Biagio Di Mauro<sup>1</sup>, Andrea Franzetti<sup>1</sup>, Massimiliano Nastasi<sup>1,9</sup>, Michele Prata<sup>10</sup>, Paolo Prati<sup>5,6</sup>, Ezio Previtali<sup>1,9</sup>, Barbara Delmonte<sup>1</sup>, Valter Maggi<sup>1,2</sup>

<sup>1</sup> Environmental and Earth Sciences Department, University of Milano-Bicocca, Milano, 20126, Italy.

<sup>2</sup> INFN section of Milano-Bicocca, Milano, 20126, Italy.

<sup>3</sup> Department of Nuclear Physical Chemistry, Institute of Nuclear Physics Polish Academy of Sciences, Kraków, 31-342, Poland.

<sup>4</sup> Ocean and Earth Science, University of Southampton, National Oceanography Centre, Southampton, SO14 3ZH UK.

<sup>5</sup> Physics Department, University of Genoa, Genoa, 16146, Italy.

<sup>6</sup> INFN section of Genoa, Genoa, 16146, Italy.

<sup>7</sup> Department of Environmental Science and Policy, University of Milan, Milano, 20133, Italy.

<sup>8</sup> School of Geography, Earth and Environmental Sciences, University of Plymouth, Plymouth, PL48AA, UK.

<sup>9</sup> Physics Department, University of Milano-Bicocca, Milano, 20126, Italy.

<sup>10</sup> Laboratory of Applied Nuclear Energy, University of Pavia, Pavia, 27100, Italy.

*Correspondence to:* G. Baccolo (giovanni.baccolo@unimib.it)

---

In the following list the references whose data were used to create Fig. 4, are reported. Studies concerning sites where nuclear explosion tests and accidents occurred, were not taken into account. In addition to the listed studies, also the following references cited in the main text were used: Aarkrog and Dahlgaard, 1984; Kim et al., 1997, Kirchner et al., 2002.

- Aleksiaienak, Y. V., Frontasyeva, M. V., Florek, M., Sykora, I., Holy, K., Masarik, J., Brestakova, L., Jeskovsky, M., Steinnes, E., Faanhof, A., Ramatlhabe, K. I.: Distributions of <sup>137</sup>Cs and <sup>210</sup>Pb in moss collected from Belarus and Slovakia. *J. Environ. Radioactiv.* 117, 19-24, 2013.
- Ali, A. A., Ghaleb, B., Garneau, M., Asnong, H., Loisel, J.: Recent peat accumulation rates in minerotrophic peatlands of the Bay James region, Eastern Canada, inferred by <sup>210</sup>Pb and <sup>137</sup>Cs radiometric techniques. *Appl. Radiat. Isotopes* 66, 1350-1358, 2008.
- Al Hamarneh, I., Wreikat, A., Toukan, K.: Radioactivity concentrations of <sup>40</sup>K, <sup>134</sup>Cs, <sup>137</sup>Cs, <sup>90</sup>Sr, <sup>241</sup>Am, <sup>238</sup>Pu and <sup>239+240</sup>Pu radionuclides in Jordanian soil samples. *J. Environ. Radioactiv.* 67, 53-67, 2003.
- Baskaran, M., Asbill, S., Schwantes, J., Santschi, P., Champ, M. A., Brooks, J. M., Adkinson, D., Makeyev, V.: Concentrations of <sup>137</sup>Cs, <sup>239,240</sup>Pu and <sup>210</sup>Pb in Sediment Samples from the Pechora Sea and Biological Samples from the Ob, Yenisey Rivers and Kara Sea. *Mar. Pollut. Bull.* 40, 830-838, 2000.

- Belivermiş, M. and Çotuk, Y.: Radioactivity measurements in moss (*Hypnum cupressiforme*) and lichen (*Cladonia rangiformis*) samples collected from Marmara region of Turkey. J. Environ. Radioactiv. 101, 945-951, 2010.
- Belivermiş, M., Kiliç, Ö., Çayir, A., Coşkun, M., Coşkun, M.: Assessment of <sup>210</sup>Po and <sup>210</sup>Pb in lichen, moss and soil around Çan coal-fired power plant, Turkey. J. Radional. Nucl. Chem. 307, 523-531, 2016.
- Breban, D. C., Moreno, J., Mocanu, N.: Activities of Pu radionuclides and <sup>241</sup>Am in soil samples from an alpine pasture in Romania. J. Radional. Nucl. Chem. 258, 613-617, 2003.
- Caridi, F., Belvedere, A., D'Agostino, M., Marguccio, S.: <sup>137</sup>Cs activity concentration in mosses in the Calabria region, south of Italy. J. Instrum. 12, DOI: 10.1088/1748-0221/12/05/P05001, 2017.
- Duffa, C., Renaud, P., Goutelard, F.: Activities and transfers of Pu and Am in rice samples from Camargue, France. J. Radioanal. Nucl. Chem. 252, 247-248, 2002.
- Ekdal, E., Karali, T., Saç, M. M.: <sup>210</sup>Po and <sup>210</sup>Pb in soils and vegetables in Kucuk Menderes basin of Turkey. Radiat. Meas. 41, 72-77, 2006.
- Figueira, R. C. L., Tessler, M. G., de Mahiques, M. M., Cunha, I. I. L.: Distribution of <sup>137</sup>Cs, <sup>238</sup>Pu and <sup>239</sup> + <sup>240</sup>Pu in sediments of the southeastern Brazilian shelf–SW Atlantic margin. Sci. Total Environ. 357, 146-159, 2006.
- Gascò, C., Antón, M. P., Pozuelo, M., Meral, J., Gonzáles, A. M., Papucci, C., Delfanti, R.: Distributions of Pu, Am and Cs in margin sediments from the western Mediterranean (Spanish coast). J. Environ. Radioactiv. 59, 75-89, 2002.
- He, Q. and Dwelling, D. E.: The distribution of fallout <sup>137</sup>Cs and <sup>210</sup>Pb in undisturbed and cultivated soil. Appl. Radiat. Isotopes 48, 677-690, 1997.
- Heldal, H. E., Varskog, P., Føyn, L.: Distribution of selected anthropogenic radionuclides (<sup>137</sup>Cs, <sup>238</sup>Pu, <sup>239,240</sup>Pu and <sup>241</sup>Am) in marine sediments with emphasis on the Spitsbergen–Bear Island area. Sci. Total Environ. 293, 233-245, 2002.
- Huh, C. A. and Su, C. C.: Distribution of fallout radionuclides (<sup>7</sup>Be, <sup>137</sup>Cs, <sup>210</sup>Pb and <sup>239,240</sup>Pu) in soils of Taiwan. J. Environ. Radioactiv. 77, 78-100, 2004.
- Ishikawa, Y., Sato, N., Yoshihara, K.: <sup>207</sup>Bi and other fallout nuclides in sea sediments in relation to ignition loss of samples. J. Radioanal. Nucl. Chem. 137, 67-74, 1989.
- Jenkins, C. E., Wogman, N. A., Rieck, H. G.: Radionuclide distribution in olympic national park, Washington. Water Air Soil Poll. 1, 181-204, 1972.

- Jia, G., Triulzi, C., Nonnis Marzano, F., Belli, M., Vaghi, M.: The fate of plutonium,  $^{241}\text{Am}$ ,  $^{90}\text{Sr}$  and  $^{137}\text{Cs}$  in the Antarctic ecosystem. *Antarctic Science* 12, 141-148, 2000.
- Joshi, S. and McNeely, R.: Detection of fallout  $^{155}\text{Eu}$  and  $^{207}\text{Bi}$  in a  $^{210}\text{Pb}$ -dated lake sediment core. *J. Radioanal. Nucl. Chem.* 122, 183-191, 1988.
- Kahraman, A., Kaynak, G., Akkaya, G., Gürler, O., Yalçın, S.: Radioactivity measurements in epiphytic lichens of Uludağ Mountain in Western Anatolia. *J. Radioanal. Nucl. Chem.* 295, 1057-1066, 2013.
- Ketterer, M. E., Hafer, K. M., Mietelski, J. W.: Resolving Chernobyl vs. global fallout contributions in soils from Poland using Plutonium atom ratios measured by inductively coupled plasma mass spectrometry. *J. Environ. Radioactiv.* 73, 183-201, 2004.
- Komura, K.: Bismuth-207 in environmental samples. *Radioisotopes* 34, 555-558, 1985.
- Krmar, M., Wattanavatee, K., Radnović, D., Slivka, J., Bhongsuwan, T., Frontasyeva, M. V., Pavlov, S. S.: Airborne radionuclides in mosses collected at different latitudes. *J. Environ. Radioactiv.* 117, 45-48, 2013.
- LaBrecque, J. J. and Cordoves, P. R.: Determination and spatial distribution of  $^{137}\text{Cs}$  in soils, mosses and lichens near Kavanayen, Venezuela. *J. Radioanal. Nucl. Chem.* 273, 401-404, 2007.
- Lee, M. H. and Lee, C. W.: Association of fallout -derived  $^{137}\text{Cs}$ ,  $^{90}\text{Sr}$  and  $^{239,240}\text{Pu}$  with natural organic substances in soils. *J. Environ. Radioactiv.* 47, 253-262, 2000.
- Lee, M. H., Lee, C. W., Boo, B. H.: Distribution and characteristics of  $^{239,240}\text{Pu}$  and  $^{137}\text{Cs}$  in the soil of Korea. *J. Environ. Radioactiv.* 37, 1-16, 1997.
- Lee, S. H., Povinec, P. P., Wyse, E., Pham, M. K., Hong, G. H., Chung, C. S., Kim, S. H., Lee, H. J.: Distribution and inventories of  $^{90}\text{Sr}$ ,  $^{137}\text{Cs}$ ,  $^{241}\text{Am}$  and Pu isotopes in sediments of the Northwest Pacific Ocean. *Mar. Geol.* 216, 249-263, 2005.
- Lee, S. H., Oh, J. S., Lee, J. M., Lee, K. B., Park, T. S., Lujaniene, G., Valiulis, D., Šakalis, J.: Distribution characteristics of  $^{137}\text{Cs}$ , Pu isotopes and  $^{241}\text{Am}$  in soil in Korea. *Appl. Radiat. Isotopes* 81, 315-320, 2013.
- Li, C. X., Le Roux, G., Sonke, J., van Beek, P., Souhaut, M., Van der Putten, N., De Vleeschouwer, F.: Recent  $^{210}\text{Pb}$ ,  $^{137}\text{Cs}$  and  $^{241}\text{Am}$  accumulation in an ombrotrophic peatland from Amsterdam Island (Southern Indian Ocean). *J. Environ. Radioactiv.* 175-176, 164-169, 2017.
- Lindhal, P., Roos, P., Eriksson, M., Holm, E.: Distribution of Np and Pu in Swedish lichen samples (*Cladonia stellaris*) contaminated by atmospheric fallout. *J. Environ. Radioactiv.* 73, 73-85, 2004.
- Łokas, E., Mietelski, J. W., Ketterer, M. E., Kleszc, K., Wachniew, P., Michalska, S., Miecznik, M.: Sources and vertical distribution of  $^{137}\text{Cs}$ ,  $^{238}\text{Pu}$ ,  $^{239+240}\text{Pu}$  and  $^{241}\text{Am}$  in peat profiles from southwest Spitsbergen. *Appl. Radiat. Isotopes* 28, 100-108, 2013.

- Łokas, E., Bartmiński, P., Wachniew, P., Mietelski, J. W., Kawiak, T., Środoń, J.: Sources and pathways of artificial radionuclides to soils at a High Arctic site. *Environ. Sci. Pollut. R.* 21, 12479-12493, 2014.
- Machart, P., Hoffman, W., Türk, R., Steger, F.: Ecological half-life of  $^{137}\text{Cs}$  in lichens in an alpine region. *J. Environ. Radioactiv.* 97, 70-75, 2007.
- Mietelski, J. W., Olech, M. A., Sobiech-Matura, K., Howard, B. J., Gaca, P., Zwolak, M., Błażej, S., Tomankiewicz, E.:  $^{137}\text{Cs}$ ,  $^{40}\text{K}$ ,  $^{238}\text{Pu}$ ,  $^{239+240}\text{Pu}$  and  $^{90}\text{Sr}$  in biological samples from King George Island (Southern Shetlands) in Antarctica. *J. Environ. Radioactiv.* 31, 1081-1089, 2008.
- Mietelski, J. W., Gaca, P., Olech, M.: Radioactive contamination of lichens and mosses collected in South Shetlands and Antarctic Peninsula. *J. Radioanal. Nucl. Chem.* 245, 527-537, 2000.
- Mietelski, J. W., Kubica, B., Gaca, P., Tomankiewicz, E., Błażej, S., Tuteja-Krysa, M., Stobiński, M.:  $^{238}\text{Pu}$ ,  $^{239+240}\text{Pu}$ ,  $^{241}\text{Am}$ ,  $^{90}\text{Sr}$  and  $^{137}\text{Cs}$  in mountain soil samples from the Tatra National Park (Poland). *J. Radioanal. Nucl. Chem.* 275, 523-533, 2008.
- Mróz, T., Łokas, E., Kocurek, J., Gąsiorek, M.: Atmospheric fallout radionuclides in peatland from Southern Poland. *J. Environ. Radioactiv.* 175-176, 25-33, 2017.
- Navas, A., Soto, J., Machin, J.:  $^{238}\text{U}$ ,  $^{226}\text{Ra}$ ,  $^{210}\text{Pb}$ ,  $^{232}\text{Th}$  and  $^{40}\text{K}$  activities in soil profiles of the Flysch sector (central Spanish Pyrenees). *Appl. Radiat. Isotopes* 57, 579-589, 2002.
- Outula, I.: Effect of industrial pollution on the distribution of Pu and Am in soil and on soil-to-plant transfer of Pu and Am in a pine forest in SW Finland. *J. Radioanal. Nucl. Chem.* 257, 267-274, 2003.
- Popov, L., Mihailova, G., Naidenov, I.: Determination of activity ratios of  $^{238}\text{Pu}$ ,  $^{239}\text{Pu}$ ,  $^{240}\text{Pu}$ ,  $^{241}\text{Am}$ ,  $^{134}\text{Cs}$ ,  $^{137}\text{Cs}$ , and  $^{90}\text{Sr}$  in Bulgarian soils. *J. Radioanal. Nucl. Chem.* 285, 223-237, 2010.
- Quank, N. H., Long, N. Q., Lieu, D. B., Mai, T. T., Ha, N. T., Nhan, D. D., Hien, P. D.:  $^{239+240}\text{Pu}$ ,  $^{90}\text{Sr}$  and  $^{137}\text{Cs}$  inventories in surface soils of Vietnam. *J. Environ. Radioactiv.* 75, 329-337, 2004.
- Rezzoug, S., Michel, H., Fernex, F., Barci-Funel, G., Barci, V.: Evaluation of  $^{137}\text{Cs}$  fallout from the Chernobyl accident in a forest soil and its impact on Alpine Lake sediments, Mercantour Massif, S.E. France. *J. Environ. Radioactiv.* 85, 369-379, 2006.
- Schertz, M., Michel, H., Barci-Funel, G., Barci, V.: Transuranic and fission product contamination in lake sediments from an alpine wetland, Boréon (France). *J. Environ. Radioactiv.* 85, 380-388, 2006.
- Schuller, P., Voigt, G., Handl, J., Ellies, A., Oliva, L.: Global weapons' fallout  $^{137}\text{Cs}$  in soils and transfer to vegetation in south-central Chile. *J. Environ. Radioactiv.* 62, 181-193, 2002.
- Shabana, E. I. and Al-Shammari, H. L.: Assessment of the global fallout of plutonium isotopes and americium-241 in the soil of the central region of Saudi Arabia. *J. Environ. Radioactiv.* 57, 67-74, 2001.

- Skuterud, L., Gwynn, J. P., Gaare, E., Steinnes, E., Hove, K.:  $^{90}\text{Sr}$ ,  $^{210}\text{Po}$  and  $^{210}\text{Pb}$  in lichen and reindeer in Norway. *J. Environ. Radioactiv.* 84, 441-456, 2005.
  - Testa, C., Jia, G., Degetto, S., Desideri, D., Guerra, F., Meli, M. A., Rosselli, C.: Vertical profiles of  $^{239,240}\text{Pu}$  and  $^{241}\text{Am}$  in two sphagnum mosses of Italian peat. *Sci. Total Environ.* 232, 27-31, 1999.
  - Uğur, A., Özden, B., Saç, M. M., Yener, G.: Biomonitoring of  $^{210}\text{Po}$  and  $^{210}\text{Pb}$  using lichens and mosses around a uraniferous coal-fired power plant in western Turkey. *Atmos. Environ.* 37, 2237-2245, 2003.
  - Wattanawatee, K., Krmar, M., Bhogsuwan, T.: A survey of natural terrestrial and airborne radionuclides in moss samples from the peninsular Thailand. *J. Environ. Radioactiv.* 177, 113-127, 2017.
-

|                                                         | <b>Morteratsch</b> | <b>Forni</b>  |
|---------------------------------------------------------|--------------------|---------------|
| <sup>137</sup> Cs (Bq kg <sup>-1</sup> )                | 2,650 ± 3,800      | 2,000 ± 2,800 |
| <sup>207</sup> Bi (Bq kg <sup>-1</sup> )                | 9.4 ± 6.6          | 5.7 ± 2.4     |
| <sup>238</sup> Pu (Bq kg <sup>-1</sup> )                | 2.6 ± 2.5          | 0.22 ± 0.08   |
| <sup>239,240</sup> Pu (Bq kg <sup>-1</sup> )            | 78 ± 77            | 4.9 ± 0.9     |
| <sup>241</sup> Am (Bq kg <sup>-1</sup> )                | 30 ± 36            | 4.4 ± 1.6     |
| <sup>40</sup> K (Bq kg <sup>-1</sup> )                  | 810 ± 55           | 750 ± 200     |
| <sup>238</sup> U (Bq kg <sup>-1</sup> )                 | 68 ± 14            | 61 ± 22       |
| <sup>234</sup> Th (Bq kg <sup>-1</sup> )                | 88 ± 15            | 65 ± 17       |
| <sup>214</sup> Pb (Bq kg <sup>-1</sup> )                | 57 ± 7             | 44 ± 11       |
| <sup>214</sup> Bi (Bq kg <sup>-1</sup> )                | 57 ± 8             | 45 ± 12       |
| <b>Supp.</b> <sup>210</sup> Pb (Bq kg <sup>-1</sup> )   | 69 ± 6             | 55 ± 17       |
| <b>Unsupp.</b> <sup>210</sup> Pb (Bq kg <sup>-1</sup> ) | 2,700 ± 750        | 6,100 ± 1,850 |
| <sup>232</sup> Th (Bq kg <sup>-1</sup> )                | 65 ± 9             | 72 ± 6        |
| <sup>228</sup> Ac (Bq kg <sup>-1</sup> )                | 47 ± 5             | 53 ± 12       |
| <sup>224</sup> Ra (Bq kg <sup>-1</sup> )                | 34 ± 12            | 38 ± 17       |
| <sup>212</sup> Pb (Bq kg <sup>-1</sup> )                | 50 ± 3             | 54 ± 12       |
| <sup>212</sup> Bi (Bq kg <sup>-1</sup> )                | 52 ± 7             | 60 ± 15       |
| <sup>208</sup> Tl (Bq kg <sup>-1</sup> )                | 49 ± 5             | 50 ± 12       |
| <b>Organic Carbon</b><br>(m/m %)                        | 4.7 ± 0.8          | 3.6 ± 0.5     |
| <b>Elemental Carbon (m/m %)</b>                         | 0.49 ± 0.25        | 0.21 ± 0.12   |

Tab. S1 Average composition of cryoconite from the Morteratsch and Forni glaciers. Average data (and standard deviations) concerning the activity concentration of radionuclides and of carbonaceous matter are reported with respect to the two glaciers considered in this study.

| Decay Chain                 | Radionucl.        | T <sub>1/2</sub>         | $\gamma$ -line<br>energy<br>(keV) | Eff. · B.R.<br>(%) | Minimum<br>Detectable<br>Activity (Bq kg <sup>-1</sup> ) | Average<br>Uncertainty<br>(%) |
|-----------------------------|-------------------|--------------------------|-----------------------------------|--------------------|----------------------------------------------------------|-------------------------------|
| <sup>238</sup> U – natural  | <sup>210</sup> Pb | 22.3 yr                  | 46.5                              | 2.8                | 17.3                                                     | 5.9                           |
| none – artificial           | <sup>241</sup> Am | 432.2 yr                 | 59.5                              | 28.2               | 1.7                                                      | 13                            |
| <sup>238</sup> U – natural  | <sup>234</sup> Th | 24.1 d                   | 92.3-92.8                         | 2.8                | 17.7                                                     | 13                            |
| <sup>232</sup> Th – natural | <sup>212</sup> Pb | 10.64 hr                 | 238.6                             | 24.6               | 1.9                                                      | 7.8                           |
| <sup>232</sup> Th – natural | <sup>224</sup> Ra | 3.66                     | 241.0*                            | 25.8               | 21.1                                                     | 35                            |
| <sup>238</sup> U – natural  | <sup>214</sup> Pb | 26.8 min                 | 295.2                             | 9.5                | 4.7                                                      | 12                            |
| <sup>232</sup> Th – natural | <sup>228</sup> Ac | 6.15 hr                  | 338.3                             | 4.2                | 11.5                                                     | 17                            |
| <sup>238</sup> U – natural  | <sup>214</sup> Pb | 26.8 min                 | 351.9                             | 15.0               | 3.1                                                      | 9.1                           |
| <sup>232</sup> Th – natural | <sup>208</sup> Tl | 3.05 min                 | 583.2                             | 3.2                | 7.4                                                      | 16                            |
| <sup>238</sup> U – natural  | <sup>214</sup> Bi | 19.9 min                 | 609.3                             | 5.2                | 4.6                                                      | 13                            |
| none – artificial           | <sup>137</sup> Cs | 30.07 yr                 | 661.7                             | 20.4               | 0.7                                                      | 5.5                           |
| <sup>232</sup> Th – natural | <sup>212</sup> Bi | 60.55 min                | 727.3                             | 1.1                | 11.2                                                     | 27                            |
| <sup>232</sup> Th – natural | <sup>208</sup> Tl | 3.05 min                 | 860.6                             | 0.6                | 17.1                                                     | 39                            |
| <sup>232</sup> Th – natural | <sup>228</sup> Ac | 6.15 hr                  | 911.2                             | 3.7                | 2.9                                                      | 13                            |
| none – artificial           | <sup>207</sup> Bi | 31.55 yr                 | 1063.7                            | 4.5                | 2.6                                                      | 32                            |
| none – natural              | <sup>40</sup> K   | 1.3 · 10 <sup>9</sup> yr | 1460.8                            | 1.3                | 6.6                                                      | 7.4                           |
| <sup>238</sup> U – natural  | <sup>214</sup> Bi | 19.9 min                 | 1764.5                            | 1.6                | 4.4                                                      | 15                            |
| <sup>232</sup> Th – natural | <sup>208</sup> Tl | 3.05 min                 | 2614.5                            | 0.7                | 7.9                                                      | 28                            |

**Tab. S2 Details about  $\gamma$ -spectrometry. For each of the analysed nuclides the relevant analytical information is reported. B.R. corresponds to branching ratio. For the emission at 241 keV from <sup>224</sup>Ra (marked by an asterisk), a correction was needed to remove an interfering contribution from <sup>214</sup>Pb.**
