# Supplementary material for: Cryoconite as an efficient monitor for the deposition of radioactive fallout in glacial environments
Source: Copernicus journal article supplement (doi:10.5194/tc-2019-176), 2019-08-23
Supplement: Supplementary file [file tc-2019-176-AC1-supplement.pdf]

# Replies to the referees

## Referee #1

**R1:** This study presents high concentrations of radionuclides found in cryoconite collected from two mountain glaciers in European Alps. Cryoconite is organic and inorganic sediment on glacial ice and has been studied chemically and biologically on worldwide glaciers. However, there has been still limited information on radionuclides in cryoconite. The manuscript is well-written and contains interesting analytical results, which were properly discussed in terms of natural and anthropogenic sources of radionuclides. However, I have some concerns on the discussion of the accumulation processes of radionuclides in cryoconite. I would strongly suggest to revise the points indicated below before the publication.

**Reply:** Thank you very much for the comment, we will do our best to update the manuscript considering your comments which we found appropriate and constructive.

**R1:** I would strongly suggest to divide the section of “Results and discussion” into two sections: i.e. “Results” and “Discussion”, which would present the context of this paper more efficiently.

**Reply:** if possible, we would like to maintain the current structure of the paper. We have decided to merge the two parts in order to facilitate the reading to people which is not expert in the field of radioecology. In its current structure, the paper is directly divided into “logical” sections, where data are directly discussed in relation to the glaciological context and to the many comparison that we have presented. We believe that dividing results from conclusions could make more difficult to appreciate the unique radiological features of cryoconite, in particular for people not expert in the field of radioecology.

**R1:** Use carefully the terms of “cryoconite” and “cryoconite granules”. “Cryoconite” means bulk sediment on glacier ice, but “cryoconite granules” mean spherical aggregations of the sediment. This difference is particularly important when authors discuss the resident time of substances or elements in cryoconite. In many cases in the text, cryoconite should be replace to the cryoconite granules, please check it throughout the text.

**Reply:** we agree with the reviewer, we have modified the text and in particular the section entitles “The age of cryoconite and its relationship with ice surface processes”, where we have tried to better highlight the differences between cryoconite and cryoconite granules in relation to the age issue, adding some passages about this point.

**R1:** High concentrations of  $^{210}\text{Pb}$  in the cryoconite is interesting. Authors concluded that it is a result from interaction between ice, meltwater, and cryoconite. However, this could be discussed more carefully with previous works. For example, there has been a quantitative study of accumulation of  $^{210}\text{Pb}$  in snow and ice on an alpine glacier in Europe (Gäggeler et al., 1983). The age of ice at the sampling sites in this study seems to be important to explain the high  $^{210}\text{Pb}$  concentrations. If available, it would be worth to show the exact locations of samples on the glaciers and age of ice (or estimation based on the glacial ice movement). In terms of role of organic matter or biological activity for  $^{210}\text{Pb}$  in cryoconite, there have been many studies on the process of  $^{210}\text{Pb}$  (or  $^{210}\text{Po}$ ) in organics in marine or other environments (e.g. Kim et al., 2012; Fowler et al., 2011) and also on accumulations of heavy metals in snow algal cells (Fjerdingsstad, 1973), which would help to understand why the  $^{210}\text{Pb}$  was concentrated in cryoconite. Nagatsuka et al. (2010) showed the variations in stable isotopes of Pb in different organic and mineral fractions in cryoconite, which may also be worth to discuss the accumulation process of Pb in cryoconite.

**Reply:** we thank the reviewer for having suggested the mentioned paper that we didn't know. The paper is a pioneering study about the application of  $^{210}\text{Pb}$  as a dating tool for ice core samples at a high altitude Alpine glacier. Now  $^{210}\text{Pb}$  is routinely applied by the ice core community. Assuming a constant depositional rate,  $^{210}\text{Pb}$  is more abundant in surficial (and relatively young) snow and ice, while in the deeper layers of the glaciers (which are normally older) it is less abundant because of the radioactive decay. But this is true when dealing with undisturbed and high elevation cold glaciers only, where no melt occurs and where the ice stratigraphy is preserved and not altered by excessive horizontal ice motion. When we consider temperate glaciers subjected to massive melt, this is no longer true, because  $^{210}\text{Pb}$  is mobilized by meltwater and the stratigraphic signal is destroyed. This is discussed by Gaggeler et al. (1983) themselves and by some of the cited references (Shotterer et al., 1977, Ambach et al., 1971). Considering the terminal part of the Morteratsch and Forni glaciers we need to highlight two points: 1) at both glaciers the terminal part is subjected to strong melt during summer and in fact the glaciers are experiencing a strong retreat. No net accumulation is possible there and thus the stratigraphic signal of  $^{210}\text{Pb}$  into the ice is completely destroyed by the mass loss and by meltwater percolation. 2) the regions of the glaciers where we have sampled cryoconite are located downstream of two steep icefalls. Such glaciological contexts are known for the effects on ice stratigraphy which is completely disarranged (Goodsell et al., 2002). For these two reasons we believe that the age of the ice where we sampled cryoconite doesn't have a relevant role in determining the amount of  $^{210}\text{Pb}$  found in cryoconite. We don't have the possibility to estimate the age of the ice at the sampling points, but we also believe that such information could be hardly obtained, considering that the ice stratigraphy is somewhat disturbed in those regions.

We have now included the suggested references about the role of organic matter and biological activity in the accumulation of radionuclides and about the ability of supraglacial debris in accumulating heavy metals and Pb stable isotopes.

**R1:** The accumulation process of elements in cryoconite should not rely on their radioactivity, but on the chemical or biological properties of each element regardless of radioactive or stable elements. Some statements in the text are misleading. For example, authors say that "cryoconite accumulates radioactivity" in L92, but cryoconite does not accumulate radioactivity, but may chemically accumulate the elements including radionuclides. Same in many places (e.g. L435-446). Please present it correctly.

**Reply:** we agree with the reviewer. We have modified several passages in the text where we have stated that "cryoconite accumulates radioactivity". In most cases we now have changed to "accumulate radionuclides". In addition, we have added a passage to better communicate that cryoconite doesn't accumulate radioactivity because it is affine for it, but because it presents a biogeochemical affinity for some species that are, by the way, radioactive:

*"The extreme ability of cryoconite is likely related to the presence of organic matter and extracellular polymeric substances which are affine for heavy metals, including the radioactive ones (Chuang et al., 2015; Gadd 1996; Fowler et al., 2010; Kim et al., 2011). An additional support for the importance of organic matter in this process is also given by previous studies showing that the organic fraction of cryoconite and snow algae accumulates heavy metals associated to anthropogenic atmospheric emissions, such as stable Pb (Fjordingstad, 1973, Nagatsuka et al., 2010)."*

**R1:** In conclusion, authors mentioned that cryoconite is a potentially hazardous material, however, I would think that this is an excessive statement and out of the context of this manuscript. There was only one sample that exceeded 10000 Bq kg<sup>-1</sup> in this study. Also, the limitation of legislations on the radioactivity in environmental materials should be shown and their potential risk for human health should be quantitatively discussed if authors want to use this statement. I would suggest to state the conclusion more objectively.

**Reply:** a comment from the second referee is very similar to this. We have thus decided to remove this passage from the Conclusions.

**R1:** Title: I would not be sure that cryoconite can be an efficient monitor of radioactive fallout. Use of “monitor” here is very vague. Based on the conclusion, we might detect artificial radioactive elements in cryoconite, but it seems to be difficult to know the time and amounts of their fallout. There might be more proper title for the manuscript.

**Reply:** we agree with the reviewer. The new proposed title is “*Cryoconite: an efficient accumulator of radioactive fallout in glacial environments*”

**R1:** L27 It would be worth to state the specific interaction between cryoconite and the environments.

**Reply:** we have added a sentence in the abstract to better present what we mean: “*We hypothesize that the impurities originally preserved into ice and mobilized with meltwater during summer, including radionuclides, are accumulated in cryoconite because of their affinity for organic matter, which is abundant in cryoconite.*”

**R1:** L28 Again, what is “an ideal monitor”? Need specific explanation.

**Reply:** we have now changed to “*matrix*”

**R1:** L47 Insert “on the ice surface” after “a dispersed material”.

**Reply:** done.

**R1:** L53 Insert “granules” after “cryoconite”.

**Reply:** done.

**R1:** L63 Insert the year of Meese et al.

**Reply:** done.

**R1:** L82-85 Nagatsuka et al. (2010) could also be worth to be cited here.

**Reply:** we have added the reference.

**R1:** L92 Please state properly that cryoconite doesn’t accumulates radioactivity, but accumulates radioactive elements.

**Reply:** we have changed accordingly.

**R1:** L103-116 It would be worth to add more information of the two glaciers in this study, for example, the reason why the authors selected these two glaciers for this study and difference of mass balance, glacial flow velocity or estimated age of ice at the sampling sites between the glaciers.

**Reply:** As partially explained in a previous reply, we don’t have the possibility to estimate the age of the ice where we have sampled cryoconite. The two glaciers present similar features: they are both experiencing a strong retreat as a consequence of a notably negative mass balance. We have selected them because of their size, we

know from our experience that cryoconite is more abundant in larger glaciers than in small ones. In addition, it should be mentioned that both the glaciers are relatively easy to access and are thus suited for multiple expeditions during summer, so as to construct multi-year records in the next years. We have included some passages to take into account these points.

**R1:** L127-128 Please show exact locations of the 12 samples for Morteratsch and 10 for Forni Glaciers on the map of Fig.2, and add their coordinates and altitudes in the Table S1. This is important to discuss the resident time of cryoconite on the glaciers. Also, please show the total amounts (dry weight) of cryoconite used in this study.

**Reply:** unfortunately we don't have the exact information about sample position and elevation. The regions of the glaciers where we sampled cryoconite are extremely dynamic. They are at same time experiencing a strong retreat (tens of meters per year) and subjected to ice horizontal flow (10-20 m per year, an accurate description of the Morteratsch glacier can be found in Rossini et al. (2018), for the Forni glacier we have available the information from the yearly monitoring activity carried out by the regional glaciological service). Considering the continuous evolution of the glacier surface in the sampling area we believe that knowing the exact position of the samples (which continuously changes) is not of primary importance, for this reason we have decided to highlight the region of the glaciers where we sampled cryoconite and not their exact location. We have decided not to add a table with the punctual details about samples, but we have added some passages in the section dedicated to site description, where we specify the altitude at which we have collected the samples and their mass.

**R1:** L168 "Pearson's correlation coefficient" instead of "Peason correlation"

**Reply:** adjusted.

**R1:** L179-184 This part, which presents mostly previous works, should not be in Results, but be moved to Introduction or discussion section.

**Reply:** we have now removed the passage which is already present in the introduction.

**R1:** L214 Suggest to start a new paragraph here.

**Reply:** done.

**R1:** It is very good to compare the results with those of other environmental samples. But, it would be better to compare with only studies in Europe in order to show whether cryconite accumulates the elements or not. Because the radionuclide activities can vary with geographical locations, i.e. the distance from the source.

**Reply:** we have considered worldwide data because our intention is to show a global comparison. It is true that for specific nuclear accidents (for example the Chornobyl one) the distance from the source is important. But this is not the case for other sources, such as the stratospheric fallout related to atmospheric nuclear tests. In this case the fallout is not coming from a specific source, but from a diffused source, making impossible to estimate a distance between the sampling site and radioactive source. The primary aim of our comparison is to show that cryoconite, regardless the geographic position, is the most efficient radioactivity accumulator. For this reason, we would prefer to maintain the comparison as it is. In addition, we note that if we considered only European data, we would have few data available and the comparison would be less significant.

**R1:** L254-255 Please clarify that this statement is from previous works (need references) or from this study.

**Reply:** we have modified this passage including references and more information about its novelty

**R1:** L274-278 The difference of the two glaciers is interesting and can be discussed in more detail here or later.

**Reply:** A discussion about the differences observed at the two glaciers in relation to the different organic matter content of cryoconite is now presented in section 4.5:

*“Another factor that should be considered to explain the stronger contamination of cryoconite from the Morteratsch glacier, is the higher concentration of carbonaceous compounds in cryoconite from this glacier, for which radionuclides are particularly affine (Chuang et al., 2015; Gadd 1996; Fowler et al., 2010; Kim et al., 2011).”*

**R1:** L304-305 Specify the time difference between “historic” and “contemporary”. It would be worth to mention the age of ice at the sampling site if available.

**Reply:** unfortunately we don’t know the age of ice at the sampling sites. To avoid any misunderstanding, we have replaced the term “historic” with past.

**R1:** L324-347 and Fig.5 It would be worth to show a map showing the geographical locations of the Caucasus, Svalbard, Chernobyl, Semipalatinsk, and the glaciers of this study.

**Reply:** we have updated Fig. 1 including a large scale map where the locations cited in the present work are shown.

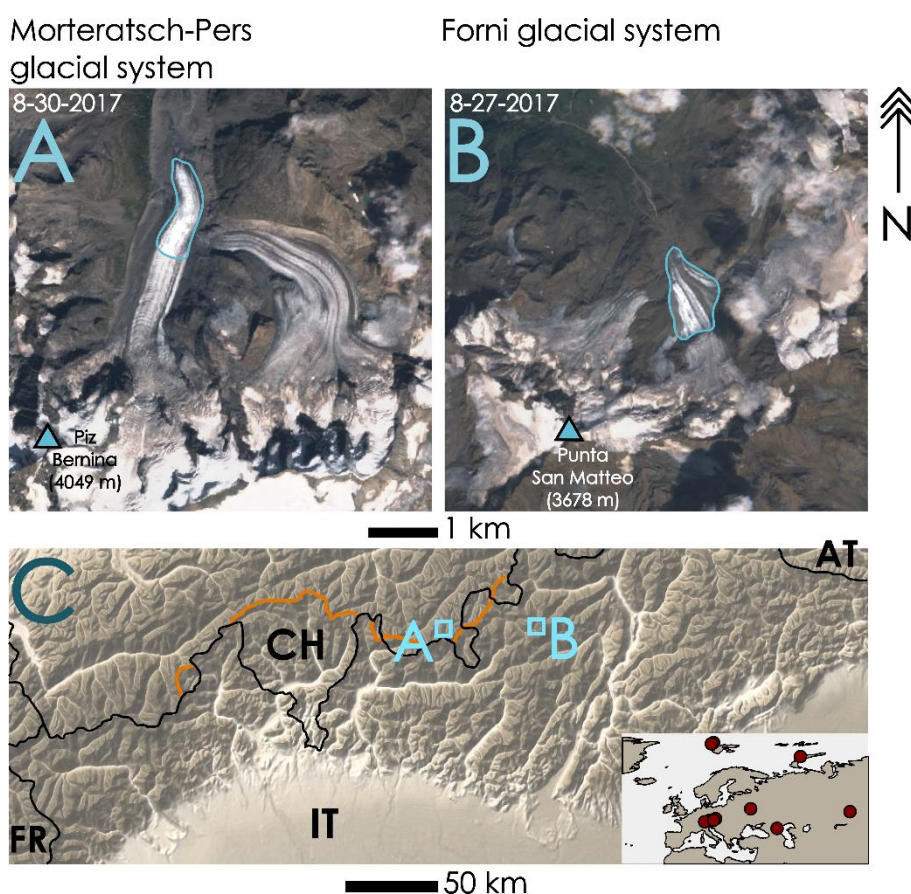

**R1:** L360-374 Organic carbon contents in cryoconite seems to be significantly different between the two glaciers. Please explain why.

**Reply:** we can make a hypothesis to explain the difference. Cryoconite sampled at the Morteratsch glacier has been obtained from an elevation between 2100 and 2300 m a.s.l., Forni cryoconite has been obtained from a higher elevation, between 2600 and 2800. The significant elevation difference could be an important factor to explain the difference in terms of organic carbon content. A higher elevation implies lower temperatures, a shorter summer season and thus a less pronounced biochemical activity. We have added a passage to present this hypothesis:

*“Cryoconite from the Morteratsch glacier presents a higher concentration of both organic and elemental carbon than the one from the Forni glacier (Student’s t test for organic carbon concentration:  $0.0010 < p\text{-value} < 0.0025$ ; degree of freedom = 9; t-score = 3.80; for elemental carbon concentration:  $0.01 < p\text{-value} < 0.05$ ; degree of freedom = 7; t-score = 3.11). We hypothesize that elevation has a role in explaining this difference. Cryoconite from the Morteratsch glacier have been sampled at an elevation between 2100 and 2300 m a.s.l., while samples from the Forni glacier have been collected between 2600 and 2800 m a.s.l. A higher elevation implies lower temperatures, a shorter summer season and thus a less pronounced biochemical activity, which is in accordance with the lower organic carbon content observed in cryoconite at the Forni glacier.”*

**R1:** L383-400 It is interesting that the radionuclides differ between the two glaciers. Authors discussed it with only the difference of altitude of the glaciers, but it needs to be discussed more carefully. What is the geology of the bedrock of the two glaciers? There is a significant difference of carbon contents in cryoconite, which could also affect the accumulation of radionuclides? Please discuss also the difference of age of ice of the glaciers.

**Reply:** we agree that the discussion here can be deepened here. We don’t think that geology has an important role, despite the two sites actually present different lithologies (regolith for the Morteratsch and schists for the Forni, but the elemental composition is not so different, we have unpublished data about this). Considering the previous comment, we can assume that elevation has two effects on cryoconite radioactivity. The first one is already discussed in the text, the second one is indirect and involves the different concentration of carbonaceous compounds. Cryoconite from the Morteratsch glacier have been sampled at lower altitude than Forni and for this reason it is more abundant in organic matter (see previous comment). Given the affinity for organic matter of many radionuclides this could be an important factor to explain the higher contamination observed at Forni for many nuclides. We have added a passage to take into account this second hypothesis:

*“Another factor that should be considered to explain the stronger contamination of cryoconite from the Morteratsch glacier, is the higher concentration of carbonaceous compounds in cryoconite from this glacier, for which radionuclides are particularly affine (Chuang et al., 2015; Gadd 1996; Fowler et al., 2010; Kim et al., 2011).”*

**R1:** L410 Clarify whether this text means “cryoconite” or “cryoconite granules”.

**Reply:** in the considered work the dating method is used to estimate the age of cryoconite, not of cryoconite granules. In the section dedicated to the links between cryoconite, its age and the glacial environment, we have now tried to clarify the differences between cryoconite, cryoconite granules and the respective age in relation to aggregation and dissolution processes involving cryoconite.

**R1:** L420 Again, insert “granules” after cryoconite, and check it throughout this paragraph.

**Reply:** we would like to maintain cryoconite here. We believe that the accumulation of radionuclides is something that involves cryoconite regardless its aggregation state. In the present paragraphs we have made several changes to better highlight the differences between cryoconite, cryoconite granules and age.

**R1:** L434 What is “absorption”? Explain and clarify it.

**Reply:** we agree that this is not the best term. We have thus decided to change it with “continuous accumulation”.

**R1:** L447-449 It is likely, but please explain more carefully how the organics incorporate the elements, by microbial metabolism, or by just chemical combination? Also, discuss it with the difference of organic matter contents between the two glaciers.

**Reply:** we cannot go too much in detail here because we don't have direct observations about the binding mechanism between radionuclides, organic matter and/or microbes. We have reviewed the literature about this topic which mostly focuses on the marine environment. It seems that radionuclides are preferentially bound to organic colloid and polymeric extracellular macromolecules rather than being incorporated into microbial cells (Gadd 1996; Yang et al., 2013; Chuang et al., 2015). We have already added a section where we discuss the differences observed at the two glaciers in relation to the different content of organic matter in cryoconite. We have now changed the passage as follows:

*“The extreme ability of cryoconite is likely related to the presence of organic matter and extracellular polymeric substances which are affine for heavy metals, including the radioactive ones (Chuang et al., 2015; Gadd 1996; Fowler et al., 2010; Kim et al., 2011).*

**R1:** L456 “older” is very vague. What this “old” exactly means? Does it mean the time from deposition on the glacier, or from the formation of cryoconite granules?

**Reply:** cryoconite formation is a complicated process which involves biotic and abiotic mechanisms that are only partially understood. When we talk about “old” cryoconite, without referring to granules, we mean cryoconite that formed on the glacier long time ago, regardless of its aggregation state. Cryoconite is composed by local material (englacial debris, local sediments from the moraines), by remote material (aeolian dust) and by allochthonous matter (organic matter formed at the glacier surface). Cryoconite formation is definitely a complex process that is not yet fully understood. Within this context it is important to distinguish between cryoconite and cryoconite granules, as the reviewers has correctly highlighted. A cryoconite granule can be of recent formation, but the cryoconite matter can be significantly older. In the present section when we talk about cryoconite age, we refer to the time passed since its original formation as a consequence of the processes cited above, regardless of its aggregation state. We have made many changes to this section and we hope that these points are now sufficiently clear.

**R1:** L481 Again, “makes cryoconite a “sponge” for radioactivity” is misleading expression. It is not a sponge for radioactivity, but might be a sponge for the elements including the radionuclides.

**Reply:** we have now changed: *“There is evidence to suggest that the fundamental process which makes cryoconite a “sponge” for specific impurities, including radionuclides, is the interaction between ice and cryoconite itself, through the mediation of meltwater.”*
